# Supplementary material for: Deep Transcriptomic Analysis Reveals the Dynamic Developmental Progression during Early Development of Channel Catfish (Ictalurus punctatus)
Source: MDPI journal article supplement (doi:10.3390/ijms21155535), 2020-08-02
Supplement: s1 [file s1]

**Figure S1.** Overview of RNA-Seq mapping in channel catfish (*Ictalurus punctatus*).

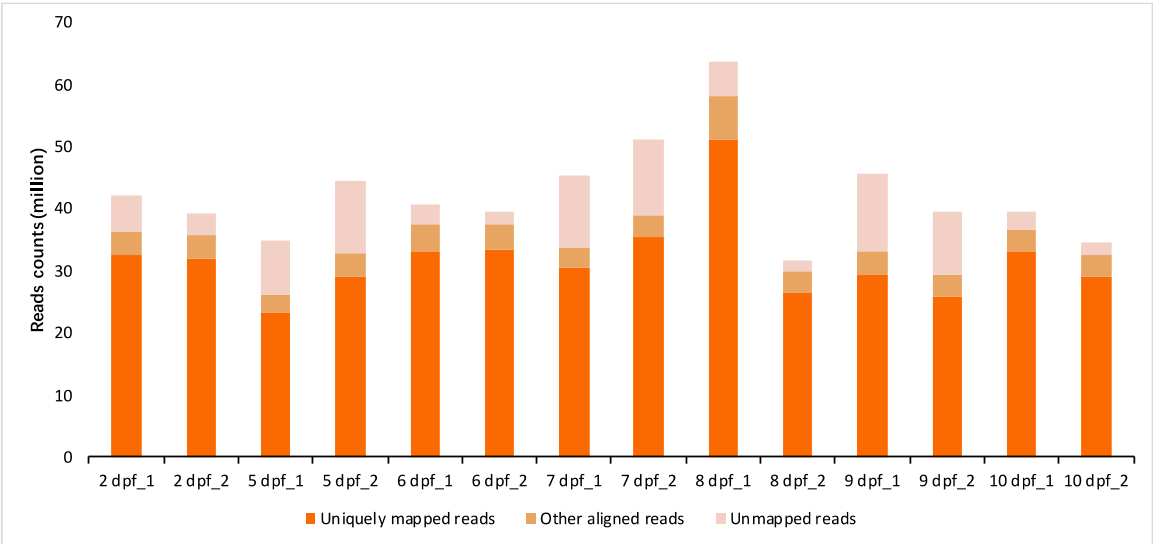

**Figure S2.** Analysis of network topology for different soft thresholding powers in channel catfish (*Ictalurus punctatus*). In the left diagram, y-axis is the scale-free fit index as a function of the soft-thresholding power (x-axis). The right diagram shows the mean connectivity (degree, y-axis) as a function of the soft-thresholding power (x-axis).

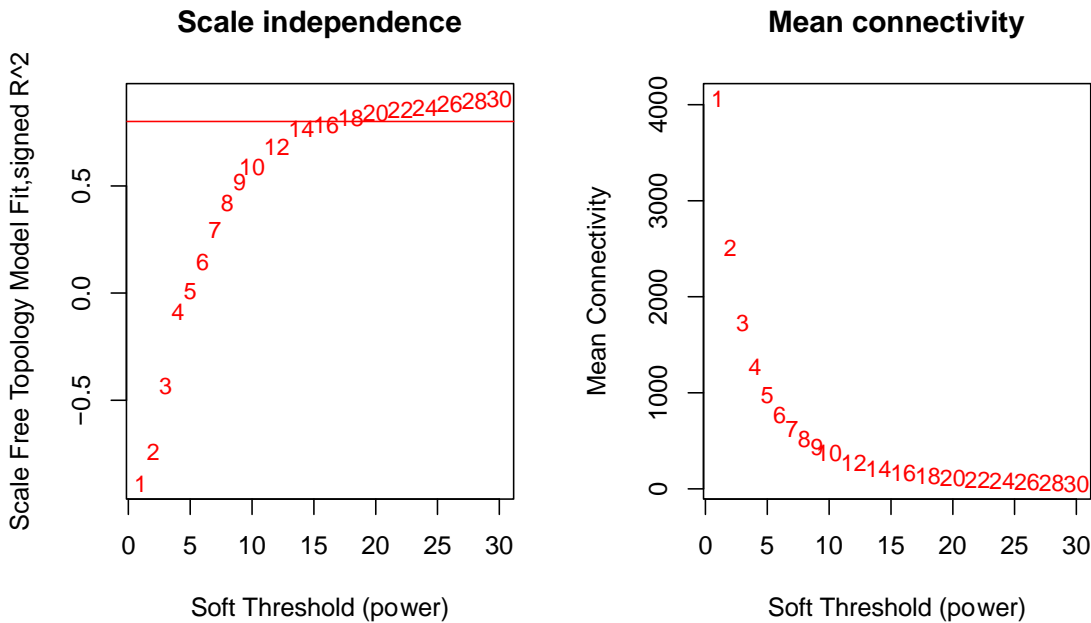

**Table S1.** Summary statistics of the transcriptome sequencing in channel catfish (*Ictalurus punctatus*) early-development stages (CCN1-N2; channel catfish days post fertilization (dpf) - replicate number).

| Samplin<br>g | No. of raw reads | No. of clean<br>reads | %GC | No. of mapped<br>reads | Mapping rate<br>(%) |
|--------------|------------------|-----------------------|-----|------------------------|---------------------|
| CC2-1        | 91,669,324       | 42,131,732            | 49  | 36,303,934             | 86.16%              |
| CC2-2        | 89,890,166       | 39,249,396            | 50  | 35,763,124             | 91.12%              |
| CC5-1        | 64,585,468       | 34,709,236            | 48  | 261,03,146             | 75.21%              |
| CC5-2        | 84,453,314       | 44,511,770            | 48  | 32,883,240             | 73.87%              |
| CC6-1        | 100,421,168      | 40,793,066            | 50  | 37,564,304             | 92.08%              |
| CC6-2        | 94,323,974       | 39,364,512            | 48  | 37,419,614             | 95.06%              |
| CC7-1        | 87,494,136       | 45,224,692            | 47  | 33,714,328             | 74.55%              |

|                   |                        |                       |               |                       |                   |
|-------------------|------------------------|-----------------------|---------------|-----------------------|-------------------|
| <del>CC7-2</del>  | <del>98,318,154</del>  | <del>51,048,372</del> | <del>47</del> | <del>39,055,300</del> | <del>76.51%</del> |
| <del>CC8-1</del>  | <del>116,489,572</del> | <del>63,382,006</del> | <del>50</del> | <del>58,254,748</del> | <del>91.91%</del> |
| <del>CC8-2</del>  | <del>73,963,212</del>  | <del>31,525,758</del> | <del>49</del> | <del>29,772,108</del> | <del>94.44%</del> |
| <del>CC9-1</del>  | <del>92,613,334</del>  | <del>45,676,882</del> | <del>47</del> | <del>33,003,294</del> | <del>72.26%</del> |
| <del>CC9-2</del>  | <del>79,448,748</del>  | <del>39,374,808</del> | <del>48</del> | <del>29,202,904</del> | <del>74.17%</del> |
| <del>CC10-1</del> | <del>89,215,722</del>  | <del>39,707,608</del> | <del>49</del> | <del>36,730,700</del> | <del>92.5%</del>  |
| <del>CC10-2</del> | <del>95,788,206</del>  | <del>34,652,038</del> | <del>48</del> | <del>32,555,886</del> | <del>93.95%</del> |
